# Supplementary material for: Feasibility of training practice nurses to deliver a psychosocial intervention within a collaborative care framework for people with depression and long-term conditions
Source: PubMed Central journal article supplement (PMC5142437; doi:10.1186/s12912-016-0190-2), 2016-12-07
Supplement: 12912_2016_190_MOESM1_ESM.pdf [file 12912_2016_190_MOESM1_ESM.pdf]

## 1 **Recruitment to service evaluation**

2 Practices were invited to register an interest in the pilot with Bradford and Airedale PCT and  
3 commit to identification of at least one practice nurse (or equivalent role) who would take  
4 part and build depression case management into LTC clinics currently in operation. Each  
5 practice indicated they would allocate 0.5 clinical sessions weekly for the identified practice  
6 nurse to be funded by the CCG. Practices also agreed to identify one or more GP's who  
7 would be designated with the role of providing clinical advice and supervision to the nurse  
8 in relation to this role as well as one administration person to liaise with the evaluation  
9 team regarding the collection of anonymous clinical data. In addition, it was deemed to be  
10 beneficial to attempt to identify a local MH specialist to support the project and provide a  
11 link to local MH services.

12 Specific roles within defined within the pilot were:

- 13 • Practice nurses: To attend training and deliver Brief Behavioural Activation (BBA) led  
14 case management as part of their LTC clinic work. Collect session data.
- 15 • GP: To provide clinical advice and support to the practice nurse relating to the  
16 administration of depression treatments as part of collaborative care.
- 17 • MH specialist: To provide support to practices in the setting up and running of the  
18 service by offering consultation on cases and access to referral pathways where  
19 needed (following consultation as part of CC process).
- 20 • Administrative staff: To collate information in consultation with evaluation team and  
21 supply this data at agreed time points.
- 22 • Pilot Evaluation team: To deliver training and monitor progress of the pilot service  
23 evaluation, in addition to problem solving and evaluation of outcomes.
