# Supplementary material for: Feasibility of training practice nurses to deliver a psychosocial intervention within a collaborative care framework for people with depression and long-term conditions
Source: PubMed Central journal article supplement (PMC5142437; doi:10.1186/s12912-016-0190-2), 2016-12-07
Supplement: 12912_2016_190_MOESM2_ESM.pdf [file 12912_2016_190_MOESM2_ESM.pdf]

## Summary of change in depression symptom level and service use

**Table 1: Average PHQ9 per practice at baseline and post-treatment.**

| Practice | PHQ9 (n=22)      |       |
|----------|------------------|-------|
|          | Baseline         | Post* |
| A        | 14.0             | 7.7   |
| B        | 16.6             | 13.9  |
| C        | 12.0             | 3.0   |
| D        | 11.5             | 7.5   |
| E        | No data received |       |
| F        |                  |       |
| G        |                  |       |
| H        |                  |       |

\*last observation recorded

**Table 2: Average number of contacts and related cost per practice and patient.**

| Practice | Total N Nurse<br>Contacts per<br>Practice | Average N<br>Nurse Contacts<br>per Patient | Total Cost per<br>Practice<br>£ | Average Cost<br>per Patient<br>£ |
|----------|-------------------------------------------|--------------------------------------------|---------------------------------|----------------------------------|
| A        | 41                                        | 3.7                                        | 561.70                          | 51.06                            |
| B        | 16                                        | 2.0                                        | 219.20                          | 27.40                            |
| C        | 8                                         | 8.0                                        | 109.60                          | 109.60                           |
| D        | 6                                         | 3.0                                        | 82.20                           | 41.10                            |

|       |                  |      |        |       |
|-------|------------------|------|--------|-------|
| E     | No data received |      |        |       |
| F     |                  |      |        |       |
| G     |                  |      |        |       |
| H     |                  |      |        |       |
| Total | 71               | 3.23 | 972.70 | 44.21 |
